# Supplementary material for: Analyses of the Updated “Animal rDNA Loci Database” with an Emphasis on Its New Features
Source: MDPI journal article supplement (doi:10.3390/ijms222111403), 2021-10-22
Supplement: s1 [file s1]

**Table S4.** Correlations between the rDNA locus numbers and other variables including number of chromosomes and number of Ag-NOR signals

| Variable X | Variable Y             | N <sup>1</sup> | Spearman |                 |
|------------|------------------------|----------------|----------|-----------------|
|            |                        |                | Rs       | 2-sided P-value |
| 5S rDNA    | chromosome number (2N) | 1062           | 0.015796 | 0.606947866     |
| 45S rDNA   | chromosome number (2N) | 2709           | 0.123869 | 9.85932E-11     |
| 5S rDNA    | 45S rDNA               | 974            | 0.223007 | 1.92633E-12     |
| Ag-NOR     | 45S rDNA               | 1193           | 0.760805 | 7.08E-226       |

<sup>1</sup> Number of pairwise comparisons. All distributions deviated from normality (Jarque-Bera Normality Test)
