# Supplementary material for: Analyses of the Updated “Animal rDNA Loci Database” with an Emphasis on Its New Features
Source: MDPI journal article supplement (doi:10.3390/ijms222111403), 2021-10-22
Supplement: s1 [file s1]

**Table S2.** Statistical comparison of the 5S and 45S average locus numbers using Mann-Whitney and ANOVA 1-way tests

**Mann-Whitney U test**

| 45S rDNA | P value    |            |            |       |          |          |          |          |
|----------|------------|------------|------------|-------|----------|----------|----------|----------|
|          |            | Amphibians | Arthropods | Birds | Fish     | Mammals  | Mollusks | Reptiles |
|          | Amphibians | -          | 3.87E-03   | 0.21  | 4.76E-05 | 9.72E-13 | 1.48E-04 | 9.98E-02 |
|          | Arthropods |            | -          | 0.35  | 0.02     | 1.33E-15 | 0.08     | 4.07E-07 |
|          | Birds      |            |            | -     | 0.06     | 7.91E-07 | 0.03     | 1.85E-03 |
|          | Fish       |            |            |       | -        | 2.15E-11 | 0.37     | 5.79E-11 |
|          | Mammals    |            |            |       |          | -        | 1.96E-03 | 1.11E-16 |
|          | Mollusks   |            |            |       |          |          | -        | 9.48E-10 |
|          | Reptiles   |            |            |       |          |          |          | -        |

**ANOVA 1-way test**

| 45S rDNA |            | P value    |            |       |          |           |          |          |
|----------|------------|------------|------------|-------|----------|-----------|----------|----------|
| F        |            | Amphibians | Arthropods | Birds | Fish     | Mammals   | Mollusks | Reptiles |
|          | Amphibians | -          | 2.31E-03   | 0.11  | 2.90E-03 | 5.04E-08  | 1.78E-03 | 8.05E-03 |
|          | Arthropods | 9.33       | -          | 0.22  | 0.04     | -6.66E-16 | 0.95     | 6.46E-07 |
|          | Birds      | 2.60       | 1.49       | -     | 0.12     | 1.25E-04  | 0.24     | 2.83E-05 |
|          | Fish       | 8.91       | 4.30       | 2.39  | -        | 2.09E-10  | 0.46     | 1.02E-05 |
|          | Mammals    | 30.89      | 87.09      | 15.05 | 41.12    | -         | 9.51E-04 | 7.27E-12 |
|          | Mollusks   | 10.02      | 0.00       | 1.38  | 0.56     | 11.11     | -        | 3.28E-10 |
|          | Reptiles   | 7.12       | 25.03      | 18.18 | 19.67    | 49.63     | 42.84    | -        |

## Mann-Whitney U test

### 5S rDNA

|            | P value    |      |          |          |
|------------|------------|------|----------|----------|
|            | Arthropods | Fish | Mammals  | Mollusks |
| Arthropods | -          | 0.07 | 5.27E-04 | 0.17     |
| Fish       |            | -    | 7.19E-04 | 0.77     |
| Mammals    |            |      | -        | 0.01     |
| Mollusks   |            |      |          | -        |

## ANOVA 1-way test

### 5S rDNA

|   |            | P value    |             |           |           |
|---|------------|------------|-------------|-----------|-----------|
| L |            | Arthropods | Fish        | Mammals   | Mollusks  |
|   | Arthropods | -          | 2.20683E-05 | 2.59E-03  | 0.0116015 |
|   | Fish       | 18.19123   | -           | 0.0384577 | 0.318481  |
|   | Mammals    | 9.381599   | 4.298139    | -         | 0.111008  |
|   | Mollusks   | 6.519994   | 0.996346    | 2.5894    | -         |

The P and F values are above and below the diagonal, respectively

The P values below 0.05 are in red
