# Supplementary material for: Analyses of the Updated “Animal rDNA Loci Database” with an Emphasis on Its New Features
Source: MDPI journal article supplement (doi:10.3390/ijms222111403), 2021-10-22
Supplement: s1 [file s1]

**Table S5.** Comparison of the frequency of 45S rDNA loci on sex chromosomes between the main groups (chi square test).

| Group      | Species with sex chromosomes | 45S rDNA on sex chromosomes | Percentage |
|------------|------------------------------|-----------------------------|------------|
| Arthropods | 733                          | 153                         | 20.9       |
| Fish       | 104                          | 29                          | 27.9       |
| Mammals    | 275                          | 14                          | 5.1        |

**The chi square statistics. The null hypothesis states that the number of loci between the groups are the same.**

Comparison of Arthropods versus fish

The chi-square statistic is 2.1562. The  $p$ -value is .141994. *Not significant at  $p < .05$ .*

The chi-square statistic with Yates correction is 1.8337. The  $p$ -value is .175686. *Not significant at  $p < .05$ .*

Comparison of Arthropods versus mammals

The chi-square statistic is 29.7448. The  $p$ -value is  $< 0.00001$ . *Significant at  $p < .05$ .*

The chi-square statistic with Yates correction is 28.7524. The  $p$ -value is  $< 0.00001$ . *Significant at  $p < .05$ .*

Comparison of fish versus mammals

The chi-square statistic is 206.9852. The  $p$ -value is  $< 0.00001$ . *Significant at  $p < .05$ .*

The chi-square statistic with Yates correction is 204.4435. The  $p$ -value is  $< 0.00001$ . *Significant at  $p < .05$ .*
