# Supplementary material for: Analyses of the Updated “Animal rDNA Loci Database” with an Emphasis on Its New Features
Source: MDPI journal article supplement (doi:10.3390/ijms222111403), 2021-10-22
Supplement: s1 [file s1]

**Table S3.** Statistical evaluation of rDNA loci variability between the groups (Levene's test).

**45S rDNA**

|            | Amphibians | Arthropods | Birds     | Fish      | Mammals     | Mollusks | Reptiles    |
|------------|------------|------------|-----------|-----------|-------------|----------|-------------|
| Amphibians | -          | 0.00190966 | 0.159373  | 0.0042522 | 7.97277E-09 | 0.003266 | 0.00241842  |
| Arthropods | 9.677662   | -          | 0.159429  | 0.0798014 | 0           | 0.810312 | 1.5289E-07  |
| Birds      | 1.994027   | 1.98223    | -         | 0.120365  | 3.82073E-05 | 0.241583 | 0.000032885 |
| Fish       | 8.209622   | 3.07215    | 2.416805  | -         | 7.53E-11    | 0.451384 | 1.04723E-05 |
| Mammals    | 34.773514  | 90.774173  | 17.409197 | 43.184004 | -           | 0.00039  | 1.99618E-13 |
| Mollusks   | 8.854008   | 0.0576379  | 1.381491  | 0.567632  | 12.835593   | -        | 4.00545E-10 |
| Reptiles   | 9.356518   | 27.874818  | 17.87318  | 19.610751 | 57.557363   | 42.38428 | -           |

The P and F values are above and below the diagonal, respectively

The P values below 0.01 are in red

**5S rDNA**

|            | Arthropods | Fish       | Mammals   | Mollusks  |
|------------|------------|------------|-----------|-----------|
| Arthropods | -          | 1.6215E-05 | 1.99E-03  | 0.0094283 |
| Fish       | 18.790627  | -          | 0.0378947 | 0.315575  |
| Mammals    | 9.896159   | 4.323361   | -         | 0.179036  |
| Mollusks   | 6.905733   | 1.00839    | 1.83346   | -         |

The P and F values are above and below the diagonal, respectively

The P values below 0.01 are in red
