# Supplementary material for: Analyses of the Updated “Animal rDNA Loci Database” with an Emphasis on Its New Features
Source: MDPI journal article supplement (doi:10.3390/ijms222111403), 2021-10-22
Supplement: s1 [file s1]

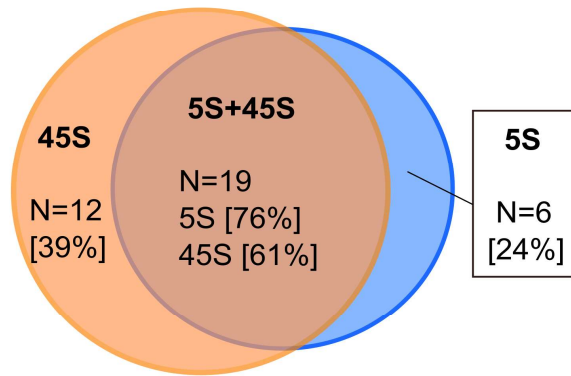

**Figure S1.** Venn diagram showing the proportion of 45S and 5S loci on sex chromosomes) in karyotypes with known position for both loci and where either 5S or 45S occur on a sex chromosome. N is the number of species.
