# Supplementary material for: Analyses of the Updated “Animal rDNA Loci Database” with an Emphasis on Its New Features
Source: MDPI journal article supplement (doi:10.3390/ijms222111403), 2021-10-22
Supplement: s1 [file s1]

**Table S1.** Statistical evaluation of number of 5S and 45S rDNA loci in karyotypes

| Taxonomy     |                    | 5S rDNA |         |         |         |       |        | 45S rDNA |         |         |         |      |        |
|--------------|--------------------|---------|---------|---------|---------|-------|--------|----------|---------|---------|---------|------|--------|
|              |                    | N       | minimum | maximum | average | s.d.  | median | N        | minimum | maximum | average | s.d. | median |
| vertebrate   | fish               | 800     | 1       | 54      | 4.24    | 4.67  | 2.00   | 892      | 1       | 54      | 3.45    | 3.91 | 2.00   |
|              | mammals            | 44      | 2       | 18      | 2.77    | 2.50  | 2.00   | 263      | 1       | 42      | 5.51    | 6.31 | 3.00   |
|              | amphibians         | 30      | 2       | 28      | 4.33    | 3.59  | 2.00   | 133      | 1       | 12      | 2.43    | 1.33 | 2.00   |
|              | reptiles           | 13      | 2       | 74      | 18.18   | 25.10 | 2.00   | 175      | 1       | 7       | 2.14    | 0.50 | 2.00   |
|              | lampreys           |         |         |         |         |       |        | 3        | 4       | 18      | 9.33    | 6.18 | 6.00   |
|              | cartilaginous fish | 2       | 4       | 4       | 4.00    | 0.00  | 4.00   | 8        | 2       | 16      | 5.00    | 4.37 | 3.75   |
|              | birds              | 8       | 2       | 2       | 2.00    | 0.00  | 2.00   | 83       | 2       | 13      | 2.78    | 1.85 | 2.00   |
| invertebrate | arthropods         | 112     | 1       | 40      | 6.46    | 7.79  | 2.25   | 1057     | 1       | 30      | 3.14    | 2.65 | 2.00   |
|              | mollusks           | 50      | 2       | 10      | 3.58    | 2.31  | 2.00   | 80       | 2       | 9       | 3.13    | 1.84 | 2.00   |
|              | annelid            |         |         |         |         |       |        | 10       | 2       | 6       | 2.55    | 0.91 | 2.00   |
|              | flatworm           | 6       | 4       | 5       | 3.50    | 1.12  | 4.00   | 14       | 2       | 8       | 3.39    | 2.02 | 2.00   |
|              | thorny-head-worms  |         |         |         |         |       |        | 2        | 4       | 4       | 4.00    | 0.00 | 4.00   |
|              | cnidaria           | 3       | 2       | 2       | 2.00    | 0.00  | 2.00   | 8        | 2       | 5       | 2.63    | 1.11 | 2.00   |

Groups used for further statistical analyses (Tables S2, S3 and S4) are highlighted

s.d. - standard deviation
